# Supplementary material for: NDRG2 mRNA levels and miR-28-5p and miR-650 activity in chronic lymphocytic leukemia
Source: PubMed Central journal article supplement (PMC6196416; doi:10.1186/s12885-018-4915-3), 2018-10-22
Supplement: 12885_2018_4915_MOESM1_ESM.pdf [file 12885_2018_4915_MOESM1_ESM.pdf]

**Additional file 1:**Sequences of qRT-pCR primers of *NDRG2* and miRNAs

| <b>Gene</b>                     |         | <b>Primer sequence (5'-3')</b>            |
|---------------------------------|---------|-------------------------------------------|
| <b>NDRG2</b>                    | forward | CCCTGTGTTCCCTTTGGGAT                      |
|                                 | reverse | GTGAGGCCTGTTAGCTTGTG                      |
| <b><math>\beta</math>-actin</b> | forward | GGCGGCACCACCATGTACCCT                     |
|                                 | reverse | AGGGGCCGGACTCGTCATACT                     |
| <b>U6</b>                       | RT      | GTCGTATCCAGTGCAGGGTCCGAGGTATTTCGCACTGGAT  |
|                                 | primer  | ACGACAAAATA                               |
|                                 | Forward | CTCGCTTCGGCAGCACATA                       |
|                                 | Reverse | GTGCAGGGTCCGAGGT                          |
| <b>miR-28-5p</b>                | RT      | CTCAACTGGTGTTCGTGGAGTCCGGCAATTCAGTTGAGCTC |
|                                 | primer  | AATAG                                     |
|                                 | Forward | ACACTCCAGCTGGGAAGGAGCTCACAGTCT            |
|                                 | Reverse | TGGTGTCGTGGAGTCG                          |
| <b>miR-650</b>                  | RT      | GTCGTATCCAGTGCCTGTTCGTGGAGTCCGGCAATTGCACT |
|                                 | primer  | GGATACGACGTCCTG                           |
|                                 | Forward | AGAGGAGGCAGCGCTCT                         |
|                                 | Reverse | CAGTGCGTGTTCGTGGAGT                       |
