# Supplementary material for: NDRG2 mRNA levels and miR-28-5p and miR-650 activity in chronic lymphocytic leukemia
Source: PubMed Central journal article supplement (PMC6196416; doi:10.1186/s12885-018-4915-3), 2018-10-22
Supplement: 12885_2018_4915_MOESM2_ESM.pdf [file 12885_2018_4915_MOESM2_ESM.pdf]

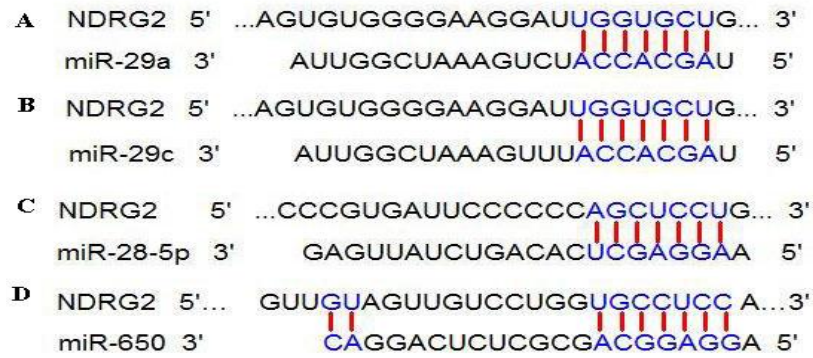

**Additional file 2** Predicting the possible binding sites of 4 miRNAs targeting *NDRG2* by bioinformatics.
