# Supplementary material for: NDRG2 mRNA levels and miR-28-5p and miR-650 activity in chronic lymphocytic leukemia
Source: Springer Nature journal article supplement (doi:10.1186/s12885-018-4915-3), 2018-10-22
Supplement: MOESM3 [file 16217292]

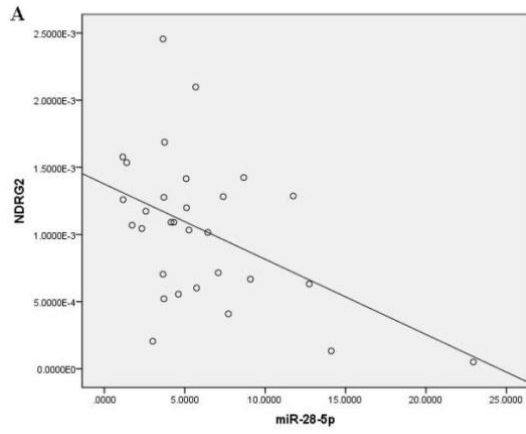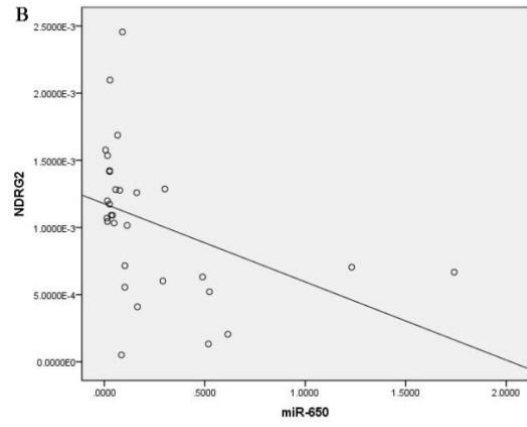

**Additional file 3** *NDRG2* mRNA levels indicating an inverse correlation with miR-28-5p and miR-650.
